# Supplementary material for: Review of the genus Loimia Malmgren, 1866 (Annelida, Terebellidae) from China seas with recognition of two new species based on integrative taxonomy
Source: PeerJ. 2020 Jul 16;8:e9491. doi: 10.7717/peerj.9491 (PMC7369024; doi:10.7717/peerj.9491)
Supplement: Supplemental Information 2 [file peerj-08-9491-s002.xls]

## Sheet: MatrixOutput
Kimura’s 2-parameter genetic distances among Loimia species collected from China and Genbank.
Species		L.borealis sp. nov.						L.ingens					L.macrobranchia sp. nov.		L.arborea			L.bandera		L.medusa		Loimia sp.						L. ramzega			Pista cristata	Terebella lapidaria
	Vouchers	MBM286586	MBM286591	MBM286593	MBM286585	MBM286587	MBM286592	MBM286600	MBM286602	MBM286597	MBM286598	MBM286601	MBM286579	MBM286580	MBM286582	MBM286581	BC016	MBM286583	MBM286584	AY040704	SERCINVERT1643	AF342685	VB2018	GP0285	GP0286	GP0287	GP0288	MNHN-IA-TYPE1788	MNHN-IA-TYPE1789	MNHN-IA-TYPE1790	H88	SIO:BIC:A1102
L.borealis sp. nov.	MBM286586
	MBM286591	0.00954497
	MBM286593	0.00762189	0.00189754
	MBM286585	0.00762189	0.00189754	0
	MBM286587	0.00570618	0.0038023	0.00189754	0.00189754
	MBM286592	0.00762189	0.00189754	0	0	0.00189754
L.ingens	MBM286600	0.251162	0.245209	0.245209	0.245209	0.248033	0.245209
	MBM286602	0.251162	0.245209	0.245209	0.245209	0.248033	0.245209	0
	MBM286597	0.251162	0.245209	0.245209	0.245209	0.248033	0.245209	0	0
	MBM286598	0.254027	0.248033	0.248033	0.248033	0.250874	0.248033	0.00189754	0.00189754	0.00189754
	MBM286601	0.251162	0.245209	0.245209	0.245209	0.248033	0.245209	0	0	0	0.00189754
L.macrobranchia sp. nov.	MBM286579	0.213072	0.212872	0.212872	0.212872	0.210227	0.212872	0.196765	0.196765	0.196765	0.199404	0.196765
	MBM286580	0.215738	0.215532	0.215532	0.215532	0.212872	0.215532	0.196765	0.196765	0.196765	0.199404	0.196765	0.0038023
L.arborea	MBM286582	0.204807	0.199478	0.199478	0.199478	0.202055	0.199478	0.235347	0.235347	0.235347	0.232637	0.235347	0.197055	0.199626
	MBM286581	0.204807	0.199478	0.199478	0.199478	0.202055	0.199478	0.235347	0.235347	0.235347	0.232637	0.235347	0.197055	0.199626	0
	BC016	0.278918	0.276246	0.279161	0.279161	0.276246	0.279161	0.30165	0.30165	0.30165	0.30468	0.30165	0.275173	0.269475	0.321459	0.321459
L.bandera	MBM286583	0.214965	0.212161	0.212161	0.212161	0.214793	0.212161	0.199338	0.199338	0.199338	0.196781	0.199338	0.212326	0.212326	0.159072	0.159072	0.267
	MBM286584	0.214965	0.212161	0.212161	0.212161	0.214793	0.212161	0.199338	0.199338	0.199338	0.196781	0.199338	0.212326	0.212326	0.159072	0.159072	0.267	0
L.medusa	AY040704	0.235725	0.235927	0.235927	0.235927	0.238674	0.235927	0.216956	0.216956	0.216956	0.214331	0.216956	0.233399	0.236139	0.224311	0.224311	0.31276	0.233	0.233
	SERCINVERT1643	0.240442	0.240271	0.240271	0.240271	0.237554	0.240271	0.210419	0.210419	0.210419	0.20778	0.210419	0.20778	0.202545	0.229356	0.229356	0.280547	0.233	0.233	0.219921
Loimia sp.	AF342685	0.209544	0.204213	0.204213	0.204213	0.206797	0.204213	0.152562	0.152562	0.152562	0.155013	0.152562	0.202373	0.199782	0.219171	0.219171	0.289063	0.214195	0.214195	0.235927	0.213949
	VB2018	0.209395	0.204086	0.204086	0.204086	0.206664	0.204086	0.155199	0.155199	0.155199	0.157668	0.155199	0.205156	0.202545	0.216679	0.216679	0.286344	0.21147	0.21147	0.238464	0.21147	0.00570618
	GP0285	0.209395	0.204086	0.204086	0.204086	0.206664	0.204086	0.155199	0.155199	0.155199	0.157668	0.155199	0.205156	0.202545	0.216679	0.216679	0.286344	0.21147	0.21147	0.238464	0.21147	0.00570618	0
	GP0286	0.209395	0.204086	0.204086	0.204086	0.206664	0.204086	0.155199	0.155199	0.155199	0.157668	0.155199	0.205156	0.202545	0.216679	0.216679	0.286344	0.21147	0.21147	0.238464	0.21147	0.00570618	0	0
	GP0287	0.209395	0.204086	0.204086	0.204086	0.206664	0.204086	0.155199	0.155199	0.155199	0.157668	0.155199	0.205156	0.202545	0.216679	0.216679	0.286344	0.21147	0.21147	0.238464	0.21147	0.00570618	0	0	0
	GP0288	0.209395	0.204086	0.204086	0.204086	0.206664	0.204086	0.155199	0.155199	0.155199	0.157668	0.155199	0.205156	0.202545	0.216679	0.216679	0.286344	0.21147	0.21147	0.238464	0.21147	0.00570618	0	0	0	0
L. ramzega	MNHN-IA-TYPE1788	0.235927	0.23029	0.23029	0.23029	0.233	0.23029	0.220894	0.220894	0.220894	0.223596	0.220894	0.187944	0.187944	0.22546	0.22546	0.291601	0.22209	0.22209	0.217804	0.206939	0.204493	0.201771	0.201771	0.201771	0.201771	0.201771
	MNHN-IA-TYPE1789	0.235927	0.23029	0.23029	0.23029	0.233	0.23029	0.220894	0.220894	0.220894	0.223596	0.220894	0.187944	0.187944	0.22546	0.22546	0.291601	0.22209	0.22209	0.217804	0.206939	0.204493	0.201771	0.201771	0.201771	0.201771	0.201771	0
	MNHN-IA-TYPE1790	0.235927	0.23029	0.23029	0.23029	0.233	0.23029	0.220894	0.220894	0.220894	0.223596	0.220894	0.187944	0.187944	0.22546	0.22546	0.291601	0.22209	0.22209	0.217804	0.206939	0.204493	0.201771	0.201771	0.201771	0.201771	0.201771	0	0
Pista cristata	H88	0.232814	0.229942	0.229942	0.229942	0.232637	0.229942	0.245761	0.245761	0.245761	0.248602	0.245761	0.223166	0.228587	0.253695	0.253695	0.283635	0.241437	0.241437	0.260676	0.247008	0.260422	0.260178	0.260178	0.260178	0.260178	0.260178	0.266721	0.266721	0.266721
Terebella lapidaria	SIO:BIC:A1102	0.301387	0.297972	0.297972	0.297972	0.294923	0.297972	0.29667	0.29667	0.29667	0.299766	0.29667	0.245574	0.248329	0.270932	0.270932	0.285314	0.280236	0.280236	0.294605	0.26154	0.265908	0.265657	0.265657	0.265657	0.265657	0.265657	0.275834	0.275834	0.275834	0.265416
Note: Pairwise genetic distances based on 612 positions of COI sequences among Loimia species from China and downloaded from Genbank.

## Sheet: Caption
Table. Estimates of Evolutionary Divergence between Sequences
The number of base substitutions per site from between sequences are shown. Standard error estimate(s) are shown above the diagonal. Analyses were conducted using the Kimura 2-parameter model [1]. The analysis involved 31 nucleotide sequences. Codon positions included were 1st+2nd+3rd+Noncoding. All positions containing gaps and missing data were eliminated. There were a total of 528 positions in…
1. Kimura M. (1980). A simple method for estimating evolutionary rate of base substitutions through comparative studies of nucleotide sequences. Journal of Molecular Evolution 16:111-120.
2. Kumar S., Stecher G., and Tamura K. (2016). MEGA7: Molecular Evolutionary Genetics Analysis version 7.0 for bigger datasets.Molecular Biology and Evolution 33:1870-1874.
Disclaimer: Although utmost care has been taken to ensure the correctness of the caption, the caption text is provided "as is" without any warranty of any kind. Authors advise the user to carefully check the caption prior to its use for any purpose and report any errors or problems to the authors immediately (www.megasoftware.net). In no event shall the authors and their employers be liable for a…
